# Supplementary material
Source: Royal Society of Chemistry journal article supplement (doi:10.1039/d6sm00346j)
Supplement: d6sm00346j1.pdf [file d6sm00346j1.pdf]

## Supplementary Information

### Computational Study of Multicharged Cyclodextrin Derivatives with Deep Cavities for High-Affinity Host-Guest Recognition

Biyang Cheng,<sup>a</sup> Qiaofei Yao,<sup>b</sup> Fuhao Ren<sup>a</sup> and Dengke Shen\*

<sup>a</sup>Institutes of Physical Science and Information Technology, Anhui University, Hefei 230601, China

<sup>b</sup>Huangshan Publishing House, Hefei 230071, China

\*Dengke Shen: [shendk@ahu.edu.cn](mailto:shendk@ahu.edu.cn); Qiaofei Yao: 1465348900@qq.com

Table S1 Summary of Vina docking scores for the twelve host–guest complexes.

| Complexes  | Vina docking scores (kJ/mol) |
|------------|------------------------------|
| ROC@SUG    | -24.26                       |
| ROC@ADA    | -31.11                       |
| PAR@host 1 | -17.73                       |
| PAR@host 2 | -23.31                       |
| ROC@host 3 | -30.84                       |
| ROC@host 4 | -31.87                       |
| ROC@host 5 | -32.00                       |
| ROC@host 6 | -32.63                       |
| SIM@host 7 | -19.18                       |
| LID@host 2 | -18.87                       |
| NEO@host 2 | -22.04                       |
| EDR@host 2 | -19.46                       |

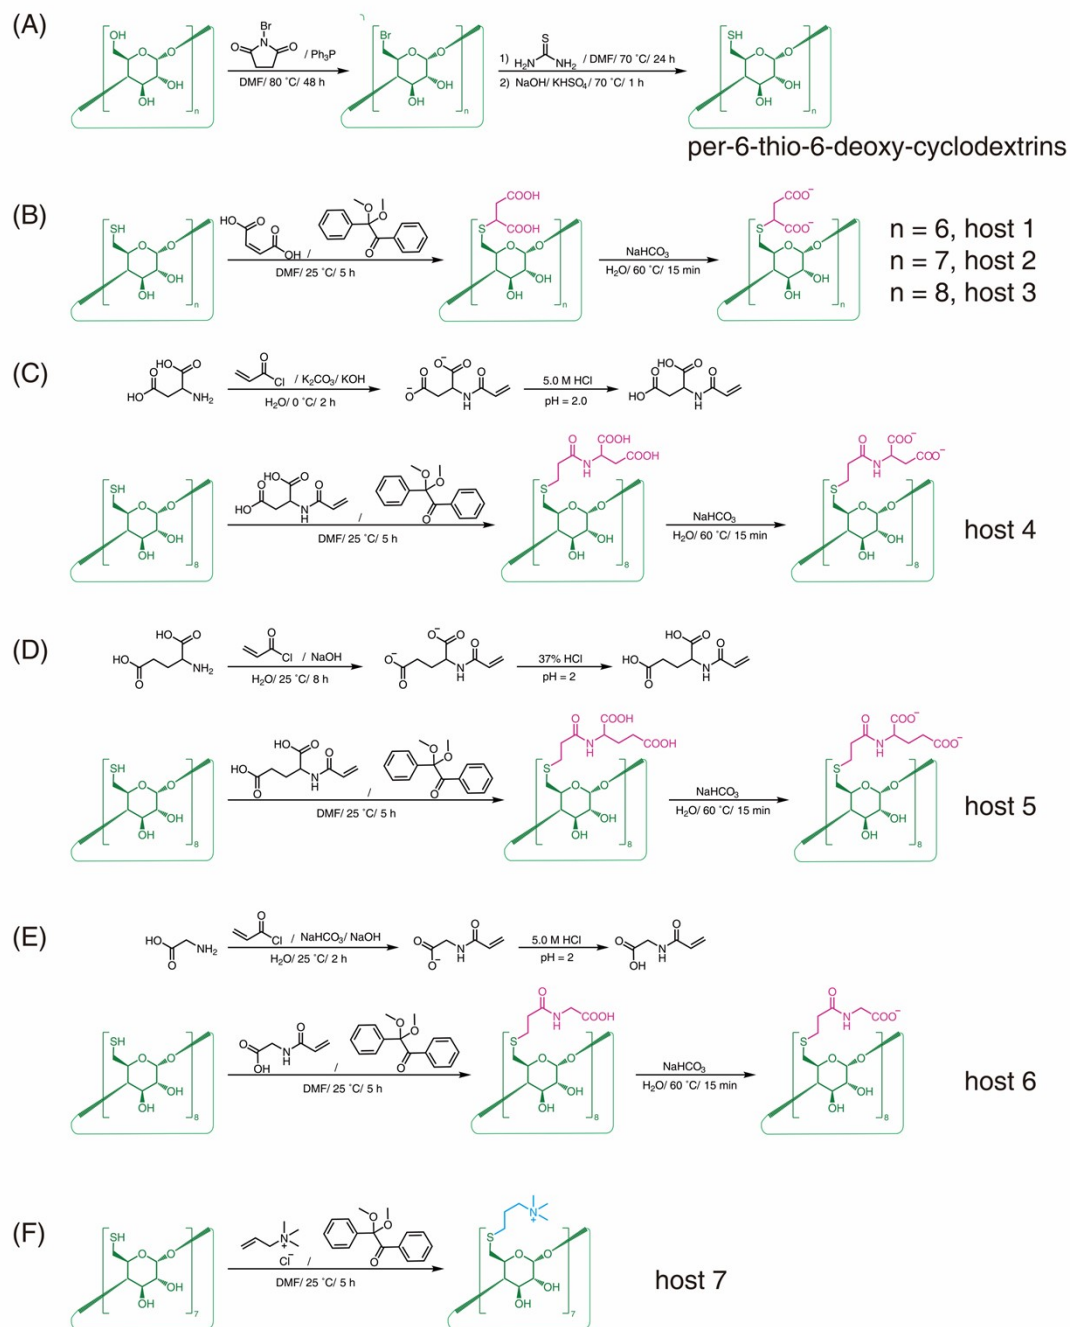

Fig. S1 Schematic diagrams of all possible synthetic routes for the hosts. Among them, (A) represents the synthesis of the intermediate product of per-6-thio-6-deoxy-cyclodextrins, where n can be 6, 7, or 8, and (B-F) represent the synthetic routes of host 1-7.

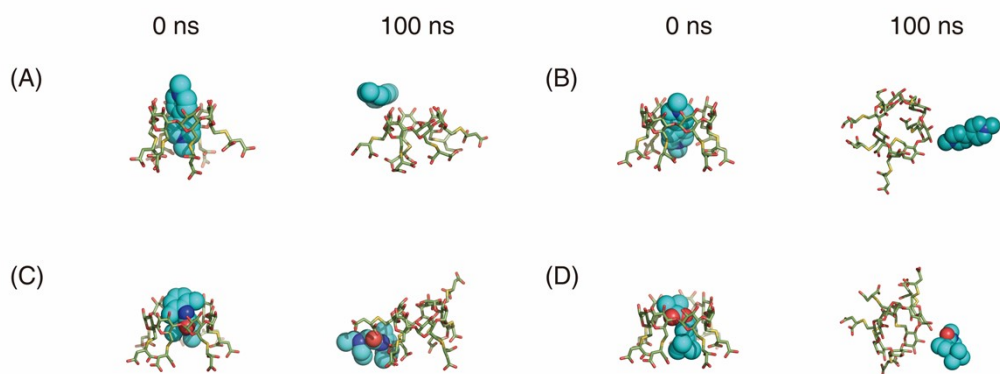

Fig. S2 Initial (0 ns) and post-simulation (100 ns) binding conformations of the four unstable complexes, where (A-D) correspond to PAR@host 1, PAR@host 2, LID@host 2, and NEO@host 2 complexes, respectively.

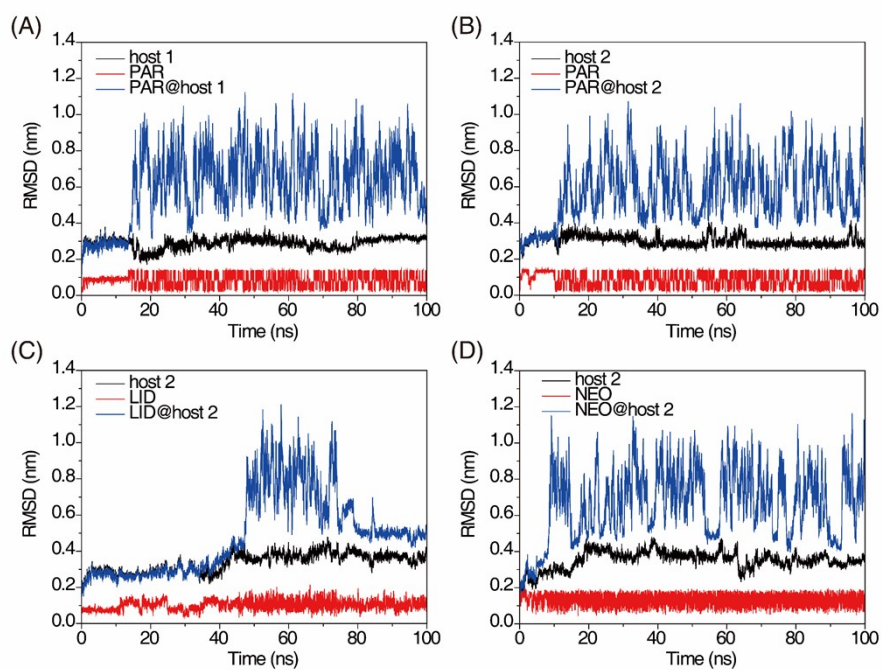

Fig. S3 Changes in the root mean square deviation (RMSD) of all unstable host-guest complexes over time.

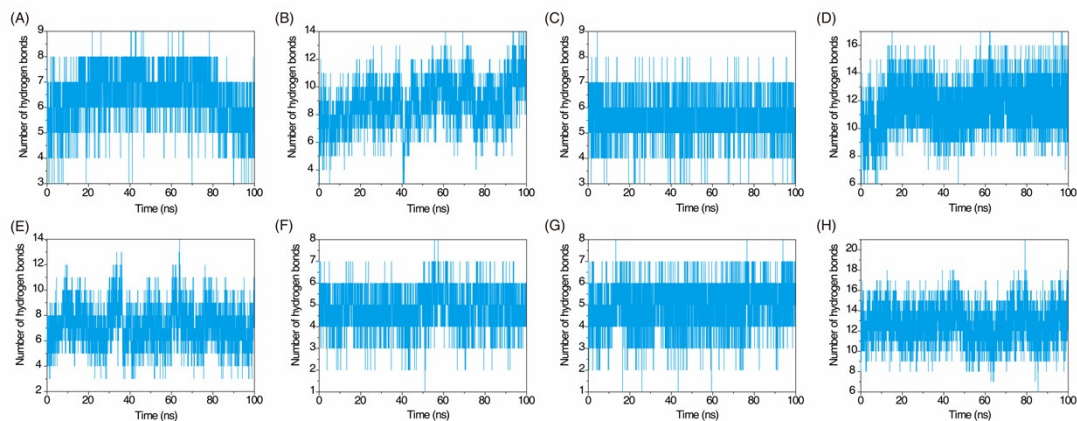

Fig. S4 The variation of the number of intramolecular hydrogen bonds in the hosts of the eight complexes over time. (A-H) correspond to ROC, ADA, host 3, host 4, host 6, host 7, host 2, and host 5, respectively.

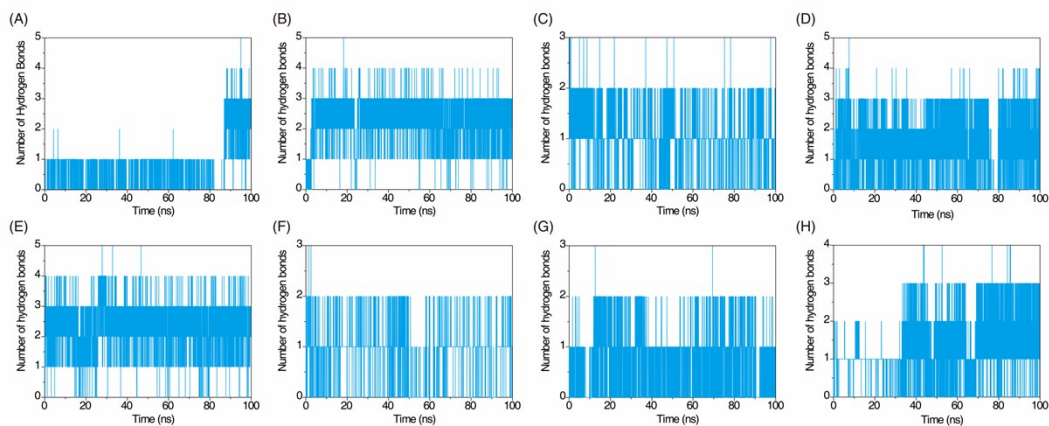

Fig. S5 The variation of the number of hydrogen bonds between the host and guest molecules in eight complexes over time. (A-H) represent ROC@SUG, ROC@ADA, ROC@host 3, ROC@host 4, ROC@host 6, SIM@host 7, EDR@host 2, and ROC@host 5, respectively.

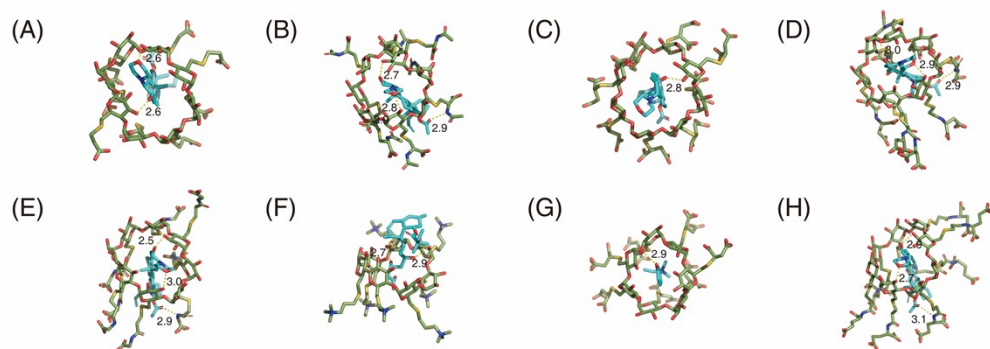

Fig. S6 Three-dimensional structures of all host–guest complexes with hydrogen bonds (yellow dashed lines) and distances (Å) indicated. (A-H) represent ROC@SUG, ROC@ADA, ROC@host 3, ROC@host 4, ROC@host 6, SIM@host 7, EDR@host 2, and ROC@host 5, respectively.
